# Supplementary material for: Transition in electronic and magnetic properties of transition metal embedded semimetallic B-graphyne
Source: Royal Society of Chemistry journal article supplement (doi:10.1039/d3cp04020h), 2023-01-01
Supplement: d3cp04020h1.pdf [file d3cp04020h1.pdf]

## Supplementary material

### Transition in electronic and magnetic properties of transition metal embedded semimetallic B-graphyne

Han-Bing Li

*Guangdong Provincial Key Laboratory of Quantum Engineering and Quantum Materials,  
School of Physics, South China Normal University, Guangzhou 510006, China*

Zhi-Gang Shao\*

*Guangdong Provincial Key Laboratory of Quantum Engineering and Quantum Materials,  
School of Physics, South China Normal University, Guangzhou 510006, China and  
Guangdong-Hong Kong Joint Laboratory of Quantum Matter,  
Frontier Research Institute for Physics, South China Normal University, Guangzhou 510006, China*

Cang-Long Wang<sup>†</sup> and Lei Yang

*Institute of Modern Physics, Chinese Academy of Sciences, Lanzhou 730000, China and  
School of Nuclear Science and Technology, University of Chinese Academy of Sciences, Beijing 100049, China  
(Dated: September 19, 2023)*

---

\* zgshao@scnu.edu.cn

<sup>†</sup> clwang@impcas.ac.cn

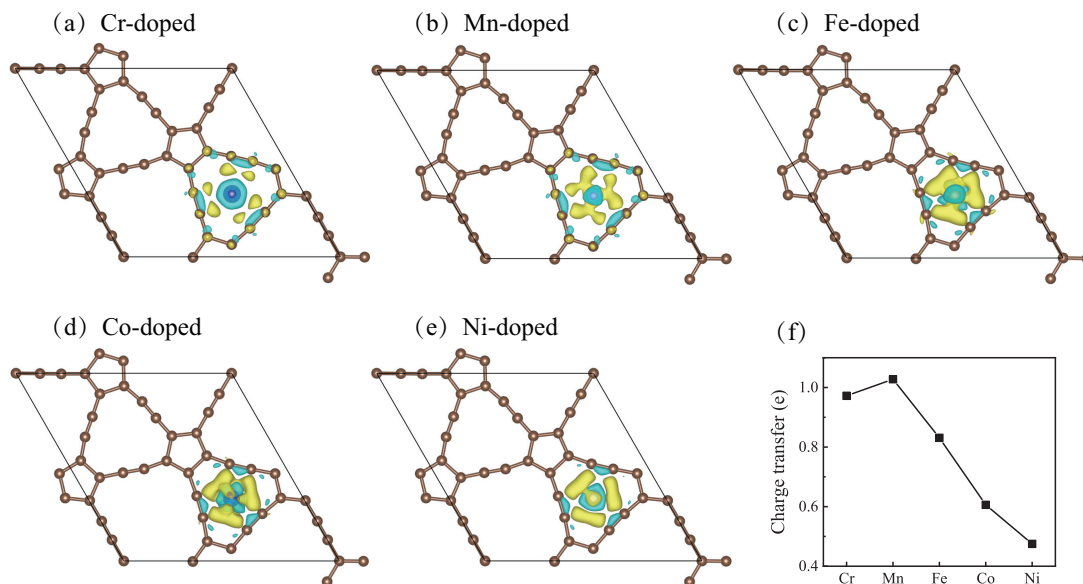

Figure S1. Differential charge density and charge transfer amount calculated using the GGA method. (a)-(e) Differential charge density of TM@B-GY with isosurface set to 0.005 e/Bohr<sup>3</sup>. Yellow and blue indicate charge accumulation and loss, respectively. (f) Charge transfer amount of B-GY doped with different TM.

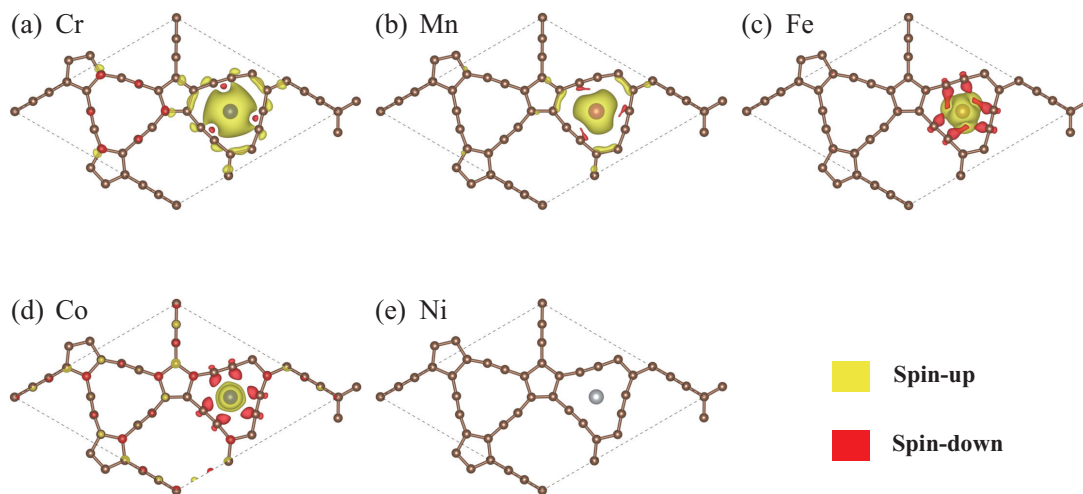

Figure S2. Spin density distribution of TM@B-GY, where yellow and red colors represent spin-up and spin-down charge densities, respectively. (a) Cr-doped, (b) Mn-doped, (c) Fe-doped, (d) Co-doped and (e) Ni-doped. The isosurface is set to 0.002 e/Bohr<sup>3</sup>.

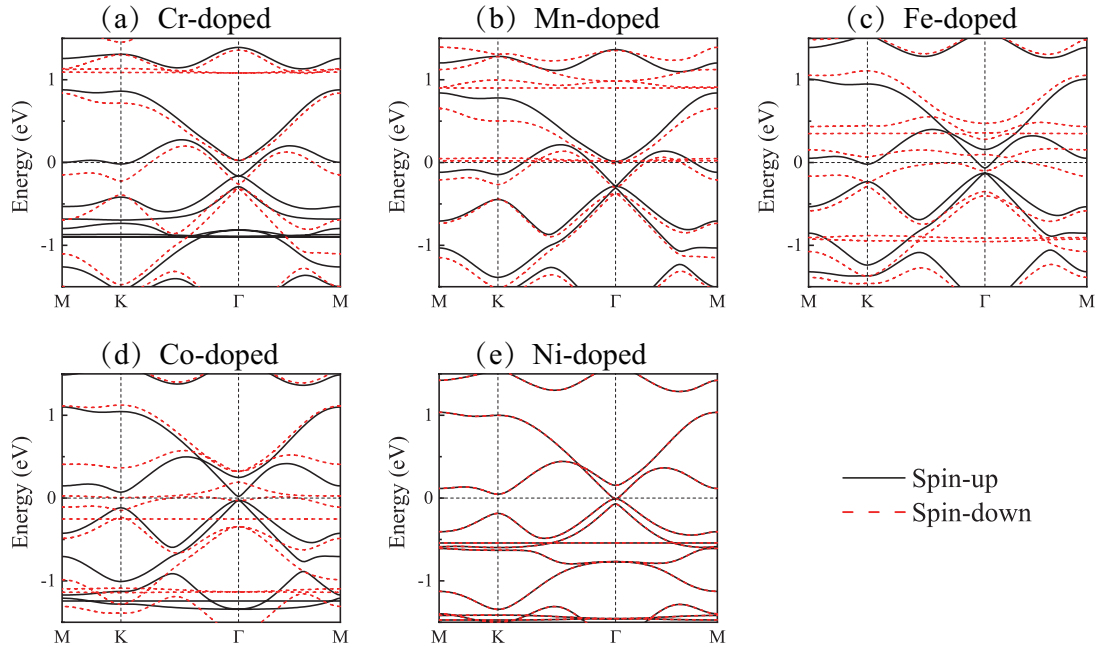

Figure S3. Band structure of TM@B-GY calculated by the GGA method. (a) Cr-doped, (b) Mn-doped, (c) Fe-doped, (d) Co-doped, (e) Ni-doped.

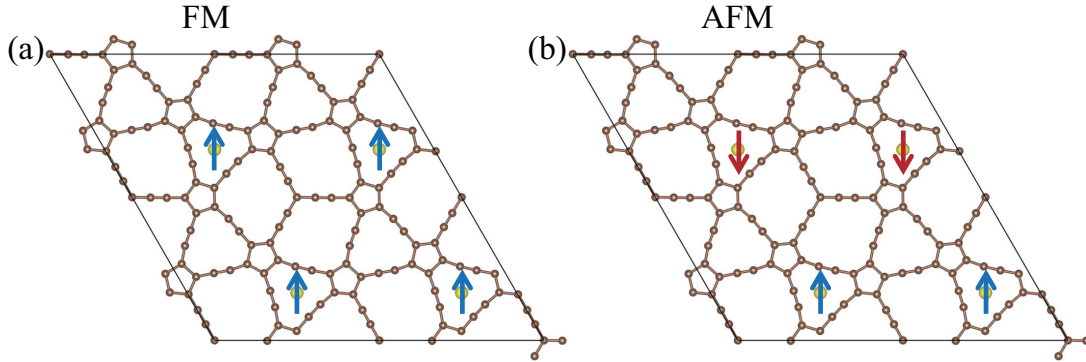

Figure S4. (a) Ferromagnetic and (b) antiferromagnetic configurations of the TM@B-GY monolayer, where brown and yellow spheres represent C and TM (Cr, Mn, Fe and Co) atoms, respectively. Arrows on TM atoms indicate different spin directions.

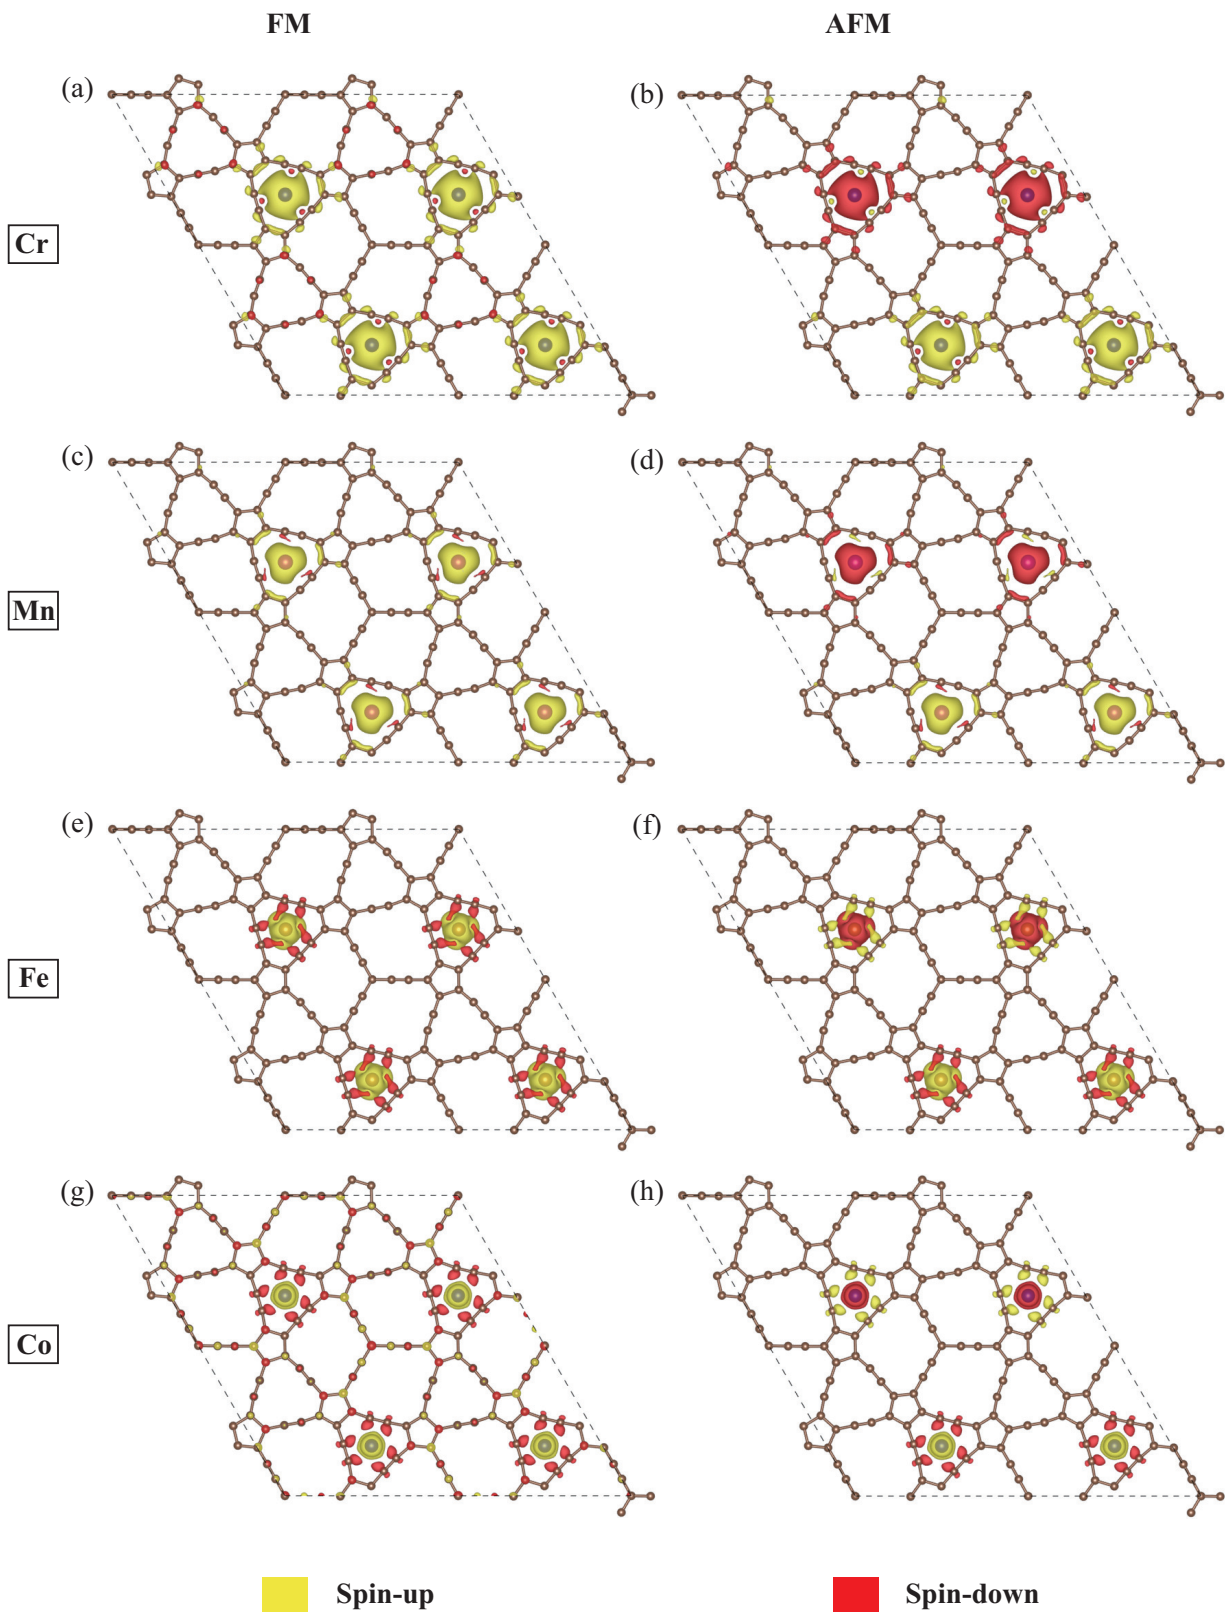

Figure S5. Spin density distribution of TM@B-GY in the ferromagnetic and antiferromagnetic states, where yellow and red colors represent spin-up and spin-down charge densities, respectively. The isosurface is set to  $0.002 \text{ e/Bohr}^3$ . The left side is the ferromagnetic state and the right side is the antiferromagnetic state. (a)-(b) Cr@B-GY, (c)-(d) Mn@B-GY, (e)-(f) Fe@B-GY and (g)-(h) Co@B-GY.
